# Supplementary material
Source: publisher figshare collection journal article supplement (https://asha.figshare.com/articles/dataset/_/16663630)
Supplement: Supplementary file 1 [file 1]

## Supplemental Material S2. Procedural reliability: Generalization.

- ☐ Symbols are rotated to prevent position bias
- ☐ Greeting 1
  - ☐ Investigator greets participant to promote small talk
  - ☐ No cues
  - ☐ Waits 15 seconds
- ☐ Requesting Probe
  - ☐ 4 activities on table in view, but out of reach
  - ☐ Investigator *OR* FCP asks, "What activity would you like to do?"
  - ☐ Investigator *OR* FCP waits 30 seconds before handing activity to participant
  - ☐ 30 seconds to complete activity was given
  - ☐ No cues were provided
- ☐ Requesting Probe
  - ☐ 4 activities on table in view, but out of reach
  - ☐ Investigator *OR* FCP asks, "What activity would you like to do?"
  - ☐ Investigator *OR* FCP waits 30 seconds before handing activity to participant
  - ☐ 30 seconds to complete activity was given
  - ☐ No cues were provided
- ☐ Requesting Probe
  - ☐ 4 activities on table in view, but out of reach
  - ☐ Investigator *OR* FCP asks, "What activity would you like to do?"
  - ☐ Investigator *OR* FCP waits 30 seconds before handing activity to participant
  - ☐ 30 seconds to complete activity was given
  - ☐ No cues were provided
- ☐ Requesting Probe
  - ☐ 4 activities on table in view, but out of reach
  - ☐ Investigator *OR* FCP asks, "What activity would you like to do?"
  - ☐ Investigator *OR* FCP waits 30 seconds before handing activity to participant
  - ☐ 30 seconds to complete activity was given
  - ☐ No cues were provided
- ☐ Comment
  - ☐ Investigator *OR* FCP asks if they like activity
  - ☐ No cues
  - ☐ Waits 15 seconds
- ☐ Comment
  - ☐ Investigator *OR* FCP asks if they like activity
  - ☐ No cues
  - ☐ Waits 15 seconds
- ☐ Greeting 2
  - ☐ Investigator says good-bye to client to facilitate small talk
  - ☐ No cues
  - ☐ Waits 15 seconds
- ☐ Session included 4 probes of commenting and four requesting probes

*Note.* FCP = familiar communication partner.
