# Supplementary material
Source: publisher figshare collection journal article supplement (https://asha.figshare.com/articles/dataset/_/16663630)
Supplement: Supplementary file 2 [file 1]

## Supplemental Material S1. Procedural reliability: Intervention.

- Symbols are rotated to prevent position bias
- Greeting 1
  - Investigator greets participant to promote small talk
  - Investigator responds to participant *OR* cues were given systematically (3 sec time delay, verbal cue, gestural cue, physical guidance, error correction) by the investigator
- Trials:
  - Ten trials are given
  - 4 activities on table in view, but out of reach
  - Investigator asks, "What activity would you like to do?"
  - Investigator waited 30 seconds for participant to respond
  - Investigator hands activity to participant if independently requested using SGD *OR* cues were given systematically (3 sec time delay, verbal cue, gestural cue, physical guidance, error correction)
  - 30 seconds to complete activity was given
  - Investigator asks, "Do you like \_\_\_?"
  - Investigator waited 15 seconds for participant to respond
  - Investigator responds to participant *OR* cues were given systematically (3 sec time delay, verbal cue, gestural cue, physical guidance, error correction)
- Probes
  - Four probes total
  - 4 activities on table in view, but out of reach
  - Investigator asks, "What activity would you like to do?"
  - Investigator waits 30 seconds before handing activity to participant *OR* hands activity to participant if independently requested using SGD
  - 30 seconds to complete activity was given
  - Investigator asks, "Do you like \_\_\_?"
  - Investigator waits 15 seconds for answer
  - No cues were provided
- Greeting 2
  - Investigator says good-bye to client to facilitate small talk
  - Investigator/unfamiliar responds to participant *OR* cues were given systematically (3 sec time delay, verbal cue, gestural cue, physical guidance, error correction)
- Session included 10 trials of both small talk and requesting
- Data sheet from investigator and observer reached at least 85% agreement
- Four probes were given

Note. SGD = speech-generating device.
