# Supplementary material
Source: publisher figshare collection journal article supplement (https://asha.figshare.com/articles/dataset/_/16663630)
Supplement: Supplementary file 3 [file 1]

### Supplemental Material S3. Treatment integrity checklist.

#### Baseline

- Symbols are rotated to prevent position bias
- Greeting 1
  - Investigator greets participant to promote small talk
  - No cues
  - Waits 15 seconds
- Requesting Probe
  - 4 activities on table in view, but out of reach
  - Investigator *OR* FCP asks, "What activity would you like to do?"
  - Investigator *OR* FCP waits 30 seconds before handing activity to participant
  - 30 seconds to complete activity was given
  - No cues were provided
- Requesting Probe
  - 4 activities on table in view, but out of reach
  - Investigator *OR* FCP asks, "What activity would you like to do?"
  - Investigator *OR* FCP waits 30 seconds before handing activity to participant
  - 30 seconds to complete activity was given
  - No cues were provided
- Requesting Probe
  - 4 activities on table in view, but out of reach
  - Investigator *OR* FCP asks, "What activity would you like to do?"
  - Investigator *OR* FCP waits 30 seconds before handing activity to participant
  - 30 seconds to complete activity was given
  - No cues were provided
- Requesting Probe
  - 4 Activities on table in view, but out of reach
  - Investigator *OR* FCP asks, "What activity would you like to do?"
  - Investigator *OR* FCP waits 30 seconds before handing activity to participant
  - 30 seconds to complete activity was given
  - No cues were provided
- Comment
  - Investigator *OR* FCP asks if they like activity
  - No cues
  - Waits 15 seconds
- Comment
  - Investigator *OR* FCP asks if they like activity
  - No cues
  - Waits 15 seconds
- Greeting 2
  - Investigator says good-bye to client to facilitate small talk
  - No cues
  - Waits 15 seconds
- Session included 4 probes of commenting and four requesting probes

Note. FCP = familiar communication partner.
